# Supplementary material
Source: PubMed Central journal article supplement (PMC3398541)

Supporting On-Line Material for:

## Only a Fraction of Quantal Content is Released During Exocytosis as Revealed by Electrochemical Cytometry of Secretory Vesicles

Donna M. Omiatek<sup>1</sup>, Yan Dong<sup>1,3</sup>, Michael L. Heien<sup>1</sup>, Andrew G. Ewing<sup>1,2</sup>

<sup>1</sup> *Department of Chemistry, The Pennsylvania State University, University Park, Pennsylvania 16802*

<sup>2</sup> *Department of Chemistry, University of Gothenburg, Kemivägen 10, SE-41296 Göteborg, Sweden*

<sup>3</sup> *Department of Neurosurgery, Changzheng Hospital, Second Military Medical University, Shanghai 200003, China*

**Supplemental Fig. 1.** Western Blot of isolated PC12 cell vesicles. Lysate from a crude suspension of PC12 vesicles was investigated for the presence of synaptophysin, a known membrane integral protein of both synaptic and neuroendocrine vesicles. Four repetitions for this experiment are depicted in each of the marked lanes. Results show the presence of synaptophysin in each of these samples as marked by the protein standard Alcohol Dehydrogenase with a molecular weight of 38 kDa.

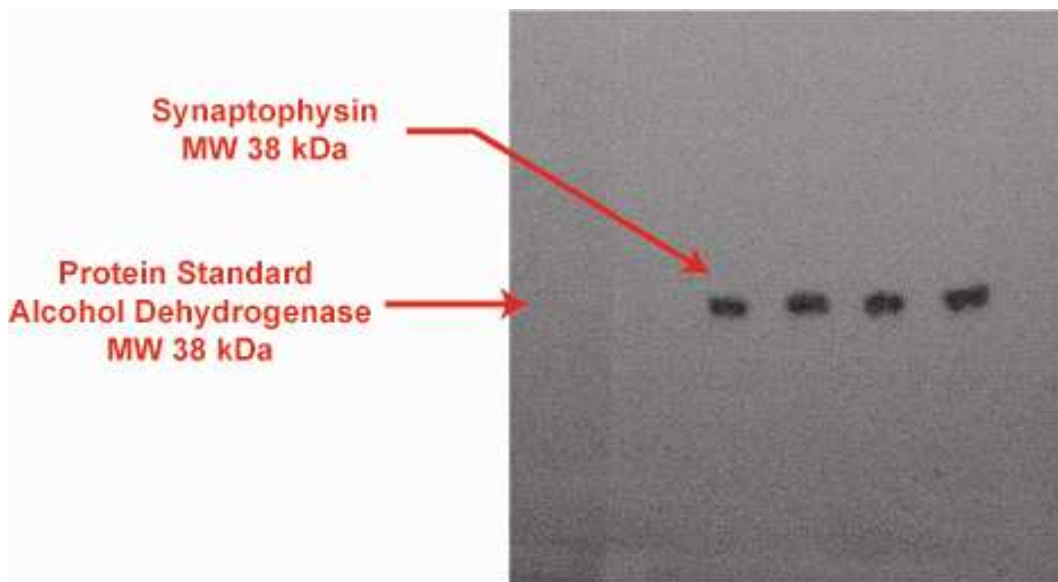

Supplement: cn900040e_si_001.pdf [file cn900040e_si_001.pdf]
